# Supplementary material for: Non-covalent modification of thrombolytic agent nattokinase: simultaneous improvement of fibrinolysis activity and enzymatic stability
Source: Royal Society of Chemistry journal article supplement (doi:10.1039/c4ra02626h), 2014-01-01
Supplement: c4ra02626h1.pdf [file c4ra02626h1.pdf]

Non-covalent modification of thrombolytic agent- nattokinase:  
Simultaneous improvement of fibrinolysis activity and  
enzymatic stability

Chen Chen<sup>1</sup>, Haogang Duan<sup>1,2</sup>, Chunmei Gao<sup>1</sup>, Mingzhu Liu<sup>1,\*</sup>, Xin'an Wu<sup>2</sup>, Yuhui Wei<sup>2</sup>, Xinyu Zhang<sup>3,\*</sup>, Zhen Liu<sup>4</sup>

<sup>1</sup>*State Key Laboratory of Applied Organic Chemistry and Department of Chemistry, Lanzhou University, Lanzhou 730000, People's Republic of China*

<sup>2</sup>*The First Hospital, Lanzhou University, Lanzhou 730000, People's Republic of China*

<sup>3</sup>*Department of Polymer and Fiber Engineering, Auburn University, Auburn, AL 36849, USA*

<sup>4</sup>*The Department of Chemical and Biomolecular Engineering, Johns Hopkins University, MD 21218, USA*

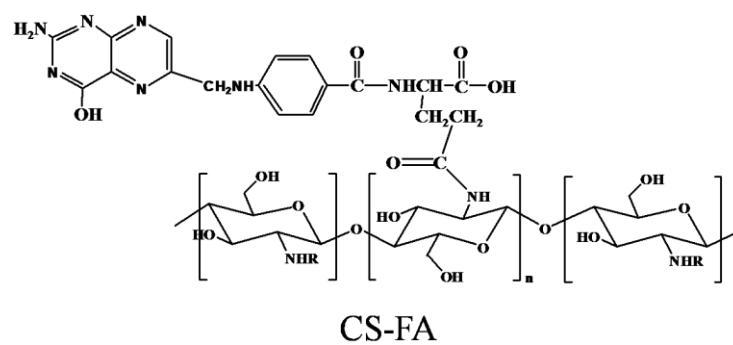

R=H or

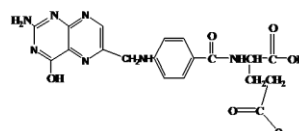

Figure S 1. Chemical structure of CS-FA.

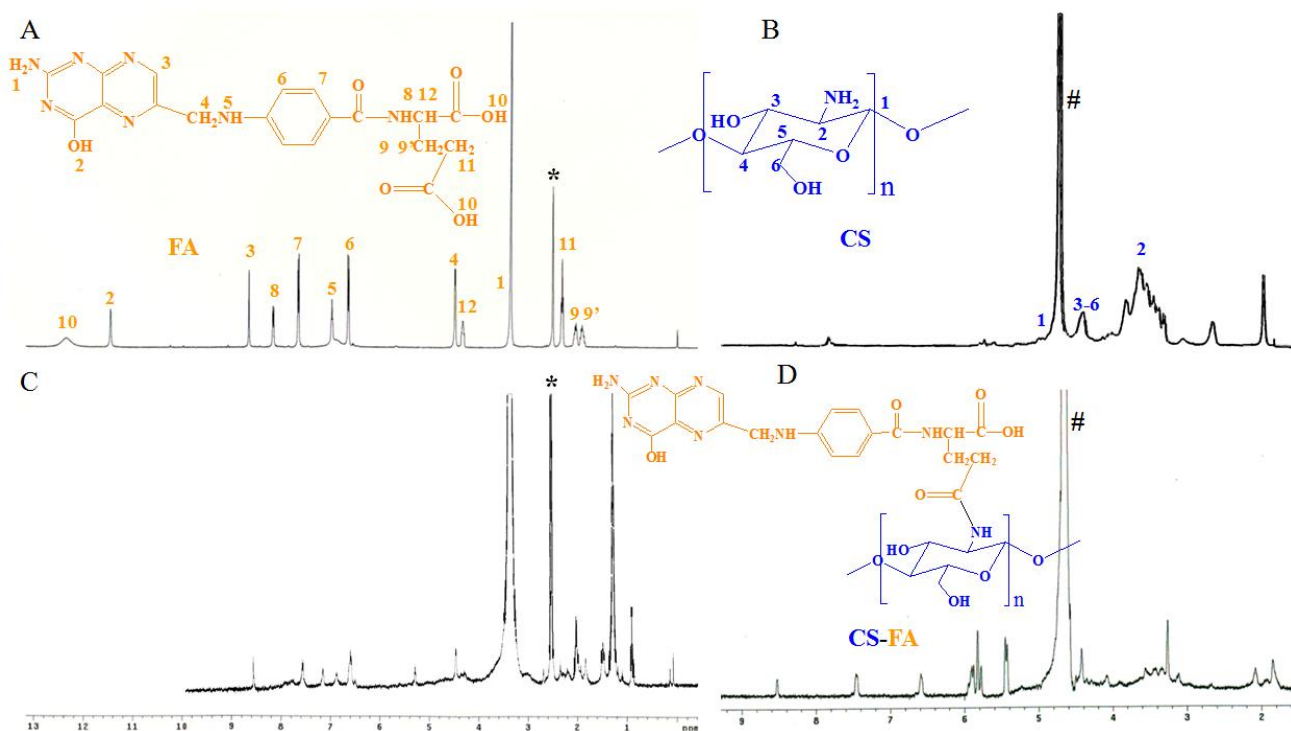

Figure S 2.  $^1\text{H}$  NMR spectra of (A) FA in  $\text{DMSO-d}_6$ , (B) CS in  $\text{D}_2\text{O}$ , (C) CS-FA

in  $\text{DMSO-d}_6$  and (D) CS-FA in  $\text{D}_2\text{O}$  (\*  $\text{DMSO-d}_6$  and #  $\text{D}_2\text{O}$ ).

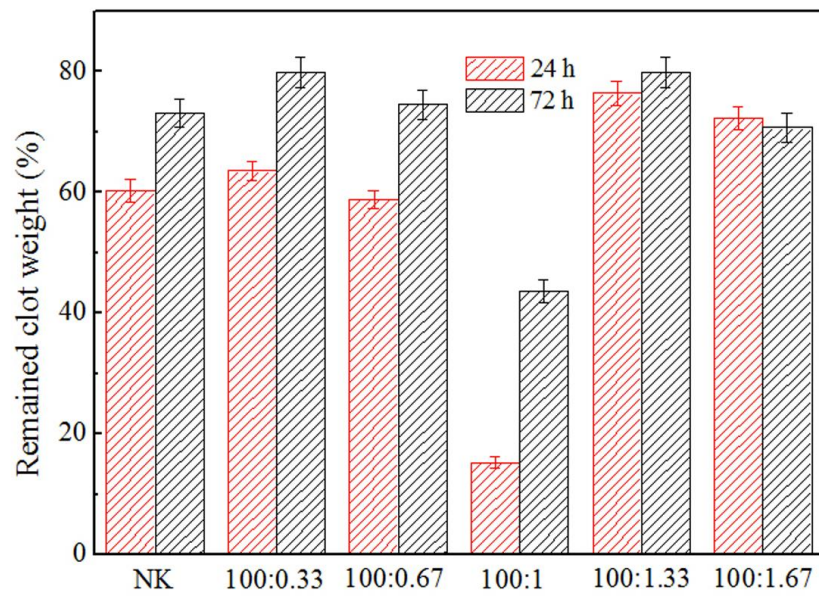

Figure S 3. Comparison of the thrombolytic efficiency between fresh and aged thrombi.

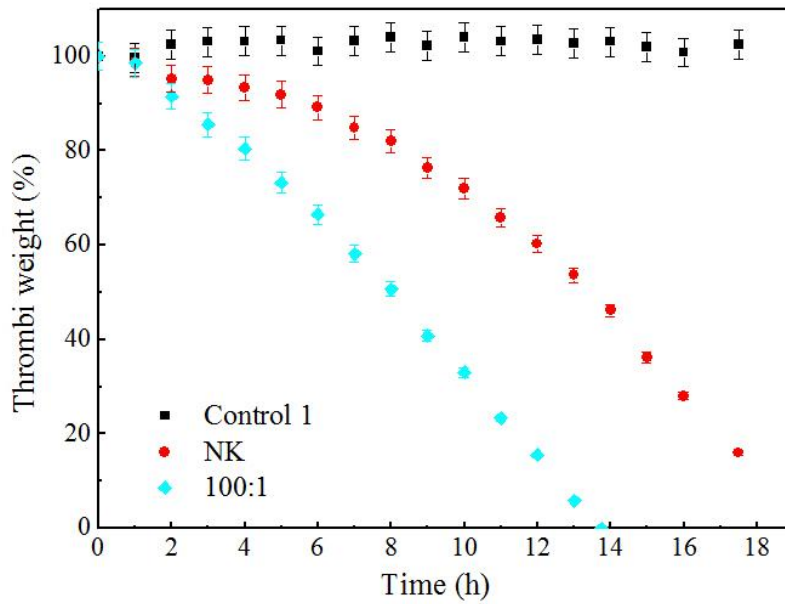

Figure S 4. In vitro thrombolysis characterization of newly formed thrombus (24 h).
